# Supplementary material for: Ultrahigh yield synthesis of mesoporous carbon nanoparticles as a superior lubricant additive for polyethylene glycol
Source: Royal Society of Chemistry journal article supplement (doi:10.1039/d0dt00053a), 2020-01-01
Supplement: d0dt00053a1.pdf [file d0dt00053a1.pdf]

# **Ultrahigh yield synthesis of mesoporous carbon nanoparticles as superior lubricant additives of polyethylene glycol**

Zihao Mou<sup>a</sup>, Baogang Wang<sup>a\*</sup>, Zhiyu Huang<sup>a</sup> and Hongsheng Lu<sup>a\*</sup>

<sup>a</sup> *College of Chemistry and Chemical Engineering, Southwest Petroleum University, Chengdu 610500, P. R. China*

---

\* Corresponding authors. E-mail: bgwang@swpu.edu.cn & hshlu@163.com; Fax: +86-28-83037330;

Tel: +86-28-83037330

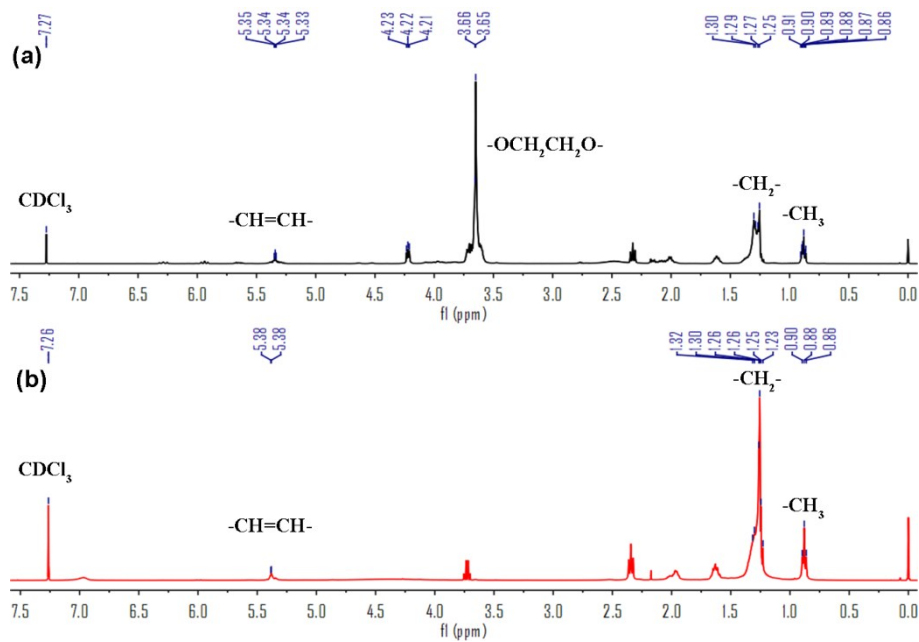

**Fig. S1**  $^1\text{H}$  NMR spectra of (a) Tween 85 and (b) MCNPs in  $\text{CDCl}_3$ .

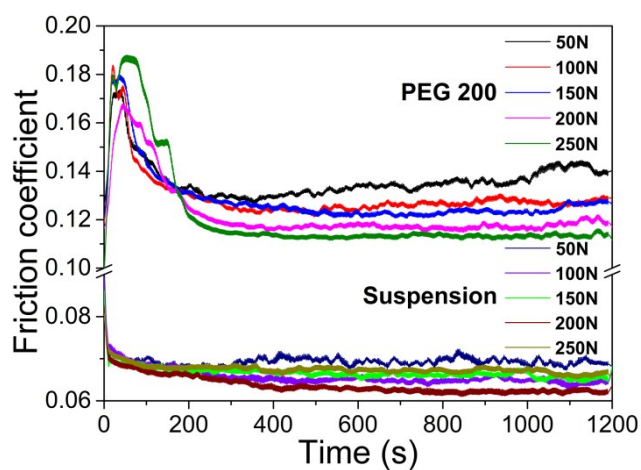

**Fig. S2** Friction coefficients curves of PEG200 and MCNPs (0.7 wt%)/PEG200 suspension under different loads.

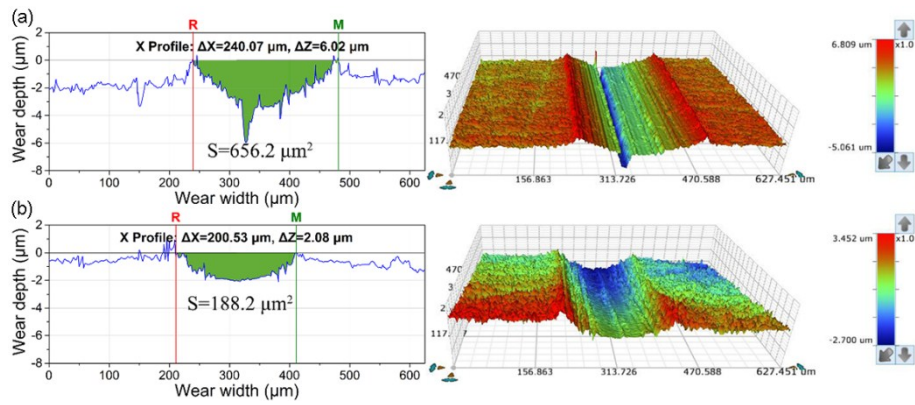

**Fig. S3** Two- and three-dimensional profiles of wear scars of lower plates lubricated by (a) PEG200 and (b) MCNPs (0.7 wt%)/PEG200 suspension under the load of 50 N.

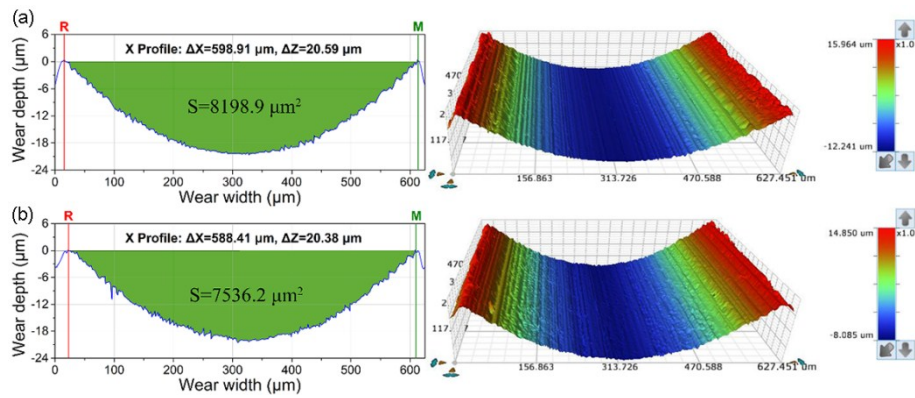

**Fig. S4** Two- and three-dimensional profiles of wear scars of lower plates lubricated by (a) PEG200 and (b) MCNPs (0.7 wt%)/PEG200 suspension under the load of 250 N.

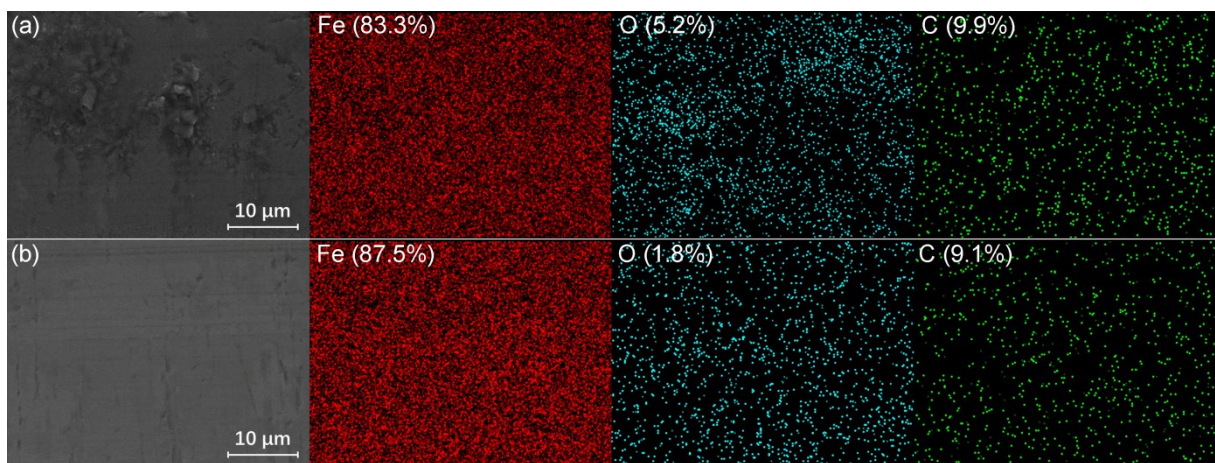

**Fig. S5** SEM images and corresponding selected area elemental maps of wear scars of lower plates lubricated by (a) PEG200 and (b) MCNPs (0.7 wt%)/PEG200 suspension (load: 100 N; sliding speed: 10 μm/s).

10 mm/s; duration: 20 min).

**Table S1** XPS elemental compositions of wear scars of lower plates lubricated by PEG200 and MCNPs (0.7 wt%)/PEG200 suspension (load: 100 N; sliding speed: 10 mm/s; duration: 20 min).

| Lubricant  | Fe (%) | Cr (%) | C (%) | O (%) | Total (%) |
|------------|--------|--------|-------|-------|-----------|
| PEG200     | 48.78  | 0.78   | 13.67 | 36.76 | 100.00    |
| Suspension | 45.72  | 1.18   | 16.83 | 36.27 | 100.00    |
